# Supplementary material for: Biomonitoring, exposure routes and risk assessment of chlorinated paraffins in humans: a mini-review
Source: Royal Society of Chemistry journal article supplement (doi:10.1039/d3em00235g), 2023-01-01
Supplement: d3em00235g1.pdf [file d3em00235g1.pdf]

## Supporting information

### **Biomonitoring, exposure routes and risk assessment of chlorinated paraffins in humans: a mini-review**

Hanyu Liao<sup>a,1</sup>, Xue Li<sup>a,1</sup>, Yuanyuan Zhou<sup>a</sup>, Yinyin Wu<sup>a</sup>, Yifei Cao<sup>a</sup>, Jun Yang<sup>a</sup>, Jianyun Zhang<sup>a,b\*</sup>

<sup>a</sup>School of Public Health, Hangzhou Normal University, Hangzhou, Zhejiang, 311121, China

<sup>b</sup>Key Laboratory of Pollution Exposure and Health Intervention of Zhejiang Province, Interdisciplinary Research Academy (IRA), Zhejiang Shuren University, Hangzhou 310015, China.

<sup>1</sup> These authors contributed equally to this work and should be considered co-first authors.

#### **Corresponding Author:**

Jianyun Zhang,

E-mail: [jianyunz@hznu.edu.cn](mailto:jianyunz@hznu.edu.cn)

Present address: School of Public Health, Hangzhou Normal University, Hangzhou, Zhejiang, 311121, China

**Table S1** Homologue profiles in human samples from different countries

| Location         | Sample                                   | Homologue profiles/congener groups                                                                                                                                                                                                                                                                                                                                                                                                                                                                                                                                                                                                                                                                                                                                                     | Ref. |
|------------------|------------------------------------------|----------------------------------------------------------------------------------------------------------------------------------------------------------------------------------------------------------------------------------------------------------------------------------------------------------------------------------------------------------------------------------------------------------------------------------------------------------------------------------------------------------------------------------------------------------------------------------------------------------------------------------------------------------------------------------------------------------------------------------------------------------------------------------------|------|
| Northern Norway  | Serum                                    | SCCP: C <sub>11</sub> ; MCCP: C <sub>14</sub> ;<br>SCCP: Cl <sub>5-6</sub> ; MCCP: Cl <sub>7-8</sub>                                                                                                                                                                                                                                                                                                                                                                                                                                                                                                                                                                                                                                                                                   | 1    |
| Australia        | Serum                                    | SCCP:<br>2012/13: C <sub>10</sub> /C <sub>11</sub> /C <sub>12</sub> /C <sub>13</sub> (20%/44%/17%/18%)<br>2014/15: C <sub>10</sub> /C <sub>11</sub> /C <sub>12</sub> /C <sub>13</sub> (3%/26%/38%/33%)<br>2012/13: Cl <sub>4-8</sub> ; 2014/15: Cl <sub>3-10</sub><br>MCCP:<br>2004/05: C <sub>14</sub> /C <sub>15</sub> /C <sub>16</sub> /C <sub>17</sub> (14%/33%/29%/23%)<br>2010/11: C <sub>14</sub> /C <sub>15</sub> /C <sub>16</sub> /C <sub>17</sub> (34%/34%/19%/13%)<br>2014/15: C <sub>14</sub> /C <sub>15</sub> /C <sub>16</sub> /C <sub>17</sub> (71%/20%/6%/3%);<br>2004/05: Cl <sub>4-8</sub> ; 2010/11: Cl <sub>4-7</sub> ; 2014/15: Cl <sub>3-8</sub>                                                                                                                  | 2    |
| Czech            | Serum                                    | SCCP: C <sub>10</sub> ; MCCP: C <sub>14</sub>                                                                                                                                                                                                                                                                                                                                                                                                                                                                                                                                                                                                                                                                                                                                          | 3    |
| Guangzhou, China | Serum                                    | SCCP:<br>C <sub>10</sub> /C <sub>11</sub> /C <sub>12</sub> /C <sub>13</sub> (0.47%/21.1%/13.5%/64.5%)<br>Cl <sub>7</sub> /Cl <sub>8</sub> /Cl <sub>9</sub> (20.3%/39.2%/27.9%)<br>MCCP: C <sub>14</sub> (95.7%);                                                                                                                                                                                                                                                                                                                                                                                                                                                                                                                                                                       | 4    |
| Jinan, China     | Serum                                    | SCCP:<br>C <sub>10</sub> /C <sub>11</sub> /C <sub>12</sub> /C <sub>13</sub> (14.4%/20.9%/17.1%/47.6%)<br>Cl <sub>5</sub> /Cl <sub>6</sub> /Cl <sub>7</sub> /Cl <sub>8</sub> /Cl <sub>9</sub> /Cl <sub>10</sub> /Cl <sub>11</sub> /Cl <sub>12</sub> /Cl <sub>13</sub> (5.5%/14.4%/35.8%/26.7%/11.6%/4.1%/1%/0.6%/0.3%)<br>MCCP:<br>C <sub>14</sub> /C <sub>15</sub> /C <sub>16</sub> /C <sub>17</sub> (53%/20.1%/18.5%/8.4%);<br>Cl <sub>5</sub> /Cl <sub>6</sub> /Cl <sub>7</sub> /Cl <sub>8</sub> /Cl <sub>9</sub> /Cl <sub>10</sub> /Cl <sub>11</sub> /Cl <sub>12</sub> /Cl <sub>13</sub> (5.2%/14.1%/23.3%/28.5%/21.7%/2.1%/1.4%/0.7%)                                                                                                                                              | 5    |
| Jinan, China     | Serum                                    | SCCP:<br>C <sub>13</sub> (41.2%), followed by C <sub>10</sub> , C <sub>11</sub> , and C <sub>12</sub> .<br>MCCP:<br>C <sub>14</sub> (40.4%), followed by C <sub>15</sub> , C <sub>16</sub> , and C <sub>17</sub> ;<br>Cl-homologues: SCCPs and MCCPs: Cl <sub>7-8</sub>                                                                                                                                                                                                                                                                                                                                                                                                                                                                                                                | 6    |
| Jinan, China     | Serum                                    | SCCP: C <sub>13</sub> (39.4%); Cl <sub>7</sub> /Cl <sub>8</sub> (36.9%/27.8%)<br>MCCP: C <sub>14</sub> /C <sub>15</sub> (41.6%/24.9%); Cl <sub>7</sub> /Cl <sub>8</sub> (26.4%/27.5%)                                                                                                                                                                                                                                                                                                                                                                                                                                                                                                                                                                                                  | 7    |
| Hangzhou, China  | Serum                                    | SCCP: C <sub>10</sub> /C <sub>11</sub> /C <sub>12</sub> /C <sub>13</sub> (81.7%/2.6%/11.2%/4.5%)<br>MCCP: C <sub>14</sub> /C <sub>15</sub> /C <sub>16</sub> /C <sub>17</sub> (54.1%/1.1%/39.8%/5%);<br>CPs:<br>Cl <sub>5</sub> /Cl <sub>6</sub> /Cl <sub>7</sub> /Cl <sub>8</sub> /Cl <sub>9</sub> /Cl <sub>10</sub> (18.3%/29.3%/20.1%/8.1%/20.8%/3.4%)                                                                                                                                                                                                                                                                                                                                                                                                                               | 8    |
| Dalian, China    | Plasma                                   | C-homologues: SCCPs: C <sub>10</sub> and C <sub>11</sub> ;<br>Cl-homologues: SCCP: Cl <sub>5-8</sub>                                                                                                                                                                                                                                                                                                                                                                                                                                                                                                                                                                                                                                                                                   | 9    |
| Shenzhen, China  | Whole blood                              | C-homologues: SCCP: C <sub>10</sub> /C <sub>11</sub> /C <sub>12</sub> /C <sub>13</sub> (7%/16%/17%/59%)<br>MCCP: C <sub>14</sub> /C <sub>15</sub> /C <sub>16</sub> (42%/23%/18%)<br>LCCP: C <sub>18</sub> /C <sub>19</sub> /C <sub>20</sub> (28%/15%/11%);<br>Cl-homologues: SCCP: Cl <sub>7-9</sub> ; MCCP: Cl <sub>8-10</sub> ; LCCP: Cl <sub>8-9</sub>                                                                                                                                                                                                                                                                                                                                                                                                                              | 10   |
| Beijing, China   | Maternal serum<br>Cord Serum             | SCCP: C <sub>10</sub> (77.3%–85.6%); Cl <sub>6</sub> /Cl <sub>7</sub> (37.1%–45.5%/28.9%–34.8%)<br>MCCP:C <sub>14</sub> (54.1%–62.4%) ; Cl <sub>7-8</sub> (58.5%–67.6%)                                                                                                                                                                                                                                                                                                                                                                                                                                                                                                                                                                                                                | 11   |
| Wuhan, China     | Maternal serum<br>Placenta<br>Cord serum | SCCP: C <sub>10</sub> /C <sub>11</sub> /C <sub>12</sub> /C <sub>13</sub> (32%/27%/18%/23%)<br>MCCP: C <sub>14</sub> /C <sub>15</sub> /C <sub>16</sub> /C <sub>17</sub> (42%/27%/18%/13%);<br>SCCP: Cl <sub>5-7</sub> (67%);MCCP: Cl <sub>5-7</sub> (72%)<br>SCCP: C <sub>10</sub> /C <sub>11</sub> /C <sub>12</sub> /C <sub>13</sub> (34%/28%/18%/20%)<br>MCCP: C <sub>14</sub> /C <sub>15</sub> /C <sub>16</sub> /C <sub>17</sub> (35%/29%/21%/15%);<br>SCCP: Cl <sub>5-7</sub> (77%)<br>MCCP: Cl <sub>5-7</sub> (76%)<br>SCCP: C <sub>10</sub> /C <sub>11</sub> /C <sub>12</sub> /C <sub>13</sub> (37%/31%/13%/19%)<br>MCCP: C <sub>14</sub> /C <sub>15</sub> /C <sub>16</sub> /C <sub>17</sub> (49%/31%/13%/8%);<br>SCCP: Cl <sub>5-7</sub> (77%);<br>MCCP: Cl <sub>5-7</sub> (70%) | 12   |

. (Continued)

**Table S1 . (Continued)**

| Location                                                                       | Sample                                               | Homologue profiles/congener groups                                                                                                                                                                                                                                                                                                                                                                                                                                                                                                                                                                                                                                                                                                                                                                                                                                                                                                                                                                                                                                                                                                                                                                                                                                                                                                                                                                                                                                                                                                                                                                                                                                                                                                          | Ref. |
|--------------------------------------------------------------------------------|------------------------------------------------------|---------------------------------------------------------------------------------------------------------------------------------------------------------------------------------------------------------------------------------------------------------------------------------------------------------------------------------------------------------------------------------------------------------------------------------------------------------------------------------------------------------------------------------------------------------------------------------------------------------------------------------------------------------------------------------------------------------------------------------------------------------------------------------------------------------------------------------------------------------------------------------------------------------------------------------------------------------------------------------------------------------------------------------------------------------------------------------------------------------------------------------------------------------------------------------------------------------------------------------------------------------------------------------------------------------------------------------------------------------------------------------------------------------------------------------------------------------------------------------------------------------------------------------------------------------------------------------------------------------------------------------------------------------------------------------------------------------------------------------------------|------|
| Mianyang, China                                                                | Maternal serum, cord serum, placenta and breast milk | C-homologues: SCCP:<br>maternal serum: C <sub>10</sub> /C <sub>11</sub> /C <sub>12</sub> /C <sub>13</sub> (40%/31%/13%/16%);<br>cord serum: C <sub>10</sub> /C <sub>11</sub> /C <sub>12</sub> /C <sub>13</sub> (42%/30%/13%/15%);<br>Placenta: C <sub>10</sub> /C <sub>11</sub> /C <sub>12</sub> /C <sub>13</sub> (39%/33%/15%/14%);<br>breast milk: C <sub>10</sub> /C <sub>11</sub> /C <sub>12</sub> /C <sub>13</sub> (39%/32%/13%/16%);<br>MCCP:<br>Maternal serum: C <sub>14</sub> /C <sub>15</sub> /C <sub>16</sub> /C <sub>17</sub> (44%/29%/17%/10%);<br>cord serum: C <sub>14</sub> /C <sub>15</sub> /C <sub>16</sub> /C <sub>17</sub> (44%/29%/17%/10%);<br>Placenta: C <sub>14</sub> /C <sub>15</sub> /C <sub>16</sub> /C <sub>17</sub> (36%/30%/21%/12%);<br>breast milk: C <sub>14</sub> /C <sub>15</sub> /C <sub>16</sub> /C <sub>17</sub> (46%/27%/17%/9%);<br>Cl-homologues:<br>SCCP: maternal serum: Cl <sub>5</sub> /Cl <sub>6</sub> /Cl <sub>7</sub> /Cl <sub>8</sub> (43%/26%/18%/9%);<br>cord serum: Cl <sub>5</sub> /Cl <sub>6</sub> /Cl <sub>7</sub> /Cl <sub>8</sub> (42%/29%/18%/9%);<br>Placenta: Cl <sub>5</sub> /Cl <sub>6</sub> /Cl <sub>7</sub> /Cl <sub>8</sub> (31%/35%/22%/9%);<br>breast milk: Cl <sub>5</sub> /Cl <sub>6</sub> /Cl <sub>7</sub> /Cl <sub>8</sub> (43%/26%/18%/9%)<br>MCCP: maternal serum: Cl <sub>5</sub> /Cl <sub>6</sub> /Cl <sub>7</sub> /Cl <sub>8</sub> (49%/24%/17%/7%);<br>cord serum: Cl <sub>5</sub> /Cl <sub>6</sub> /Cl <sub>7</sub> /Cl <sub>8</sub> (57%/22%/14%/5%);<br>Placenta: Cl <sub>5</sub> /Cl <sub>6</sub> /Cl <sub>7</sub> /Cl <sub>8</sub> (49%/28%/14%/6%);<br>breast milk: Cl <sub>5</sub> /Cl <sub>6</sub> /Cl <sub>7</sub> /Cl <sub>8</sub> (57%/22%/13%/6%) | 13   |
| Henan, China                                                                   | Placenta                                             | C-homologues: SCCP:<br>C <sub>10</sub> /C <sub>11</sub> /C <sub>12</sub> /C <sub>13</sub> (58.7%/35.59%/2.04%/3.67%)<br>MCCP:<br>C <sub>14</sub> /C <sub>15</sub> /C <sub>16</sub> /C <sub>17</sub> (15.62%/83.44%/0.83%/0.11%);<br>Cl-homologues:<br>SCCP:Cl <sub>5</sub> /Cl <sub>6</sub> /Cl <sub>7</sub> /Cl <sub>8</sub> /Cl <sub>9</sub> /Cl <sub>10</sub> (0.74%/38.99%/52.21%/5.82%/0.74%/1.5%)<br>MCCP: Cl <sub>7</sub> /Cl <sub>8</sub> (86.713%/12.473%)                                                                                                                                                                                                                                                                                                                                                                                                                                                                                                                                                                                                                                                                                                                                                                                                                                                                                                                                                                                                                                                                                                                                                                                                                                                                         | 14   |
| Kyoto and Sendai in Japan, Beijing in China, and Seoul and Busan in Korea      | Breast milk                                          | C-homologues: SCCP: C <sub>10</sub> ;<br>Cl-homologues: SCCP: Cl <sub>6-9</sub>                                                                                                                                                                                                                                                                                                                                                                                                                                                                                                                                                                                                                                                                                                                                                                                                                                                                                                                                                                                                                                                                                                                                                                                                                                                                                                                                                                                                                                                                                                                                                                                                                                                             | 15   |
| UK                                                                             | Breast milk                                          | C-homologues:<br>SCCP: C <sub>10-13</sub> ; MCCP:C <sub>14-16</sub> ;<br>Cl-homologues: Cl <sub>5-10</sub>                                                                                                                                                                                                                                                                                                                                                                                                                                                                                                                                                                                                                                                                                                                                                                                                                                                                                                                                                                                                                                                                                                                                                                                                                                                                                                                                                                                                                                                                                                                                                                                                                                  | 16   |
| Shanghai, Jiaxing, and Shaoxing (China), Stockholm (Sweden), and Bodø (Norway) | Breast milk                                          | C-homologues:<br>in total: SCCP and MCCP:C <sub>14</sub> , followed by C <sub>11</sub> and C <sub>15</sub> ;<br>LCCPs: C <sub>18</sub> .<br>Scandinavian: C <sub>11</sub> for SCCPs and C <sub>14</sub> for MCCPs.<br>Cl-homologues:<br>China: Cl <sub>2-14</sub> (53.3% -54.1%); Scandinavian: Cl <sub>2-14</sub> (52.1% - 53.0%)                                                                                                                                                                                                                                                                                                                                                                                                                                                                                                                                                                                                                                                                                                                                                                                                                                                                                                                                                                                                                                                                                                                                                                                                                                                                                                                                                                                                          | 17   |
| Shijiazhuang, China                                                            | Breast milk                                          | C-homologues: SCCP: C <sub>10</sub> /C <sub>11</sub> /C <sub>12</sub> (29.1%/28.8%/34.9%);<br>Cl-homologues: SCCP: Cl <sub>6</sub> /Cl <sub>7</sub> /Cl <sub>8</sub> (39.1%/27.6%/33.3%)                                                                                                                                                                                                                                                                                                                                                                                                                                                                                                                                                                                                                                                                                                                                                                                                                                                                                                                                                                                                                                                                                                                                                                                                                                                                                                                                                                                                                                                                                                                                                    | 18   |
| China                                                                          | Breast milk                                          | C-homologues: SCCP:<br>C <sub>10</sub> / C <sub>11</sub> (51%/28%)<br>MCCP: C <sub>14</sub> (82%);<br>Cl-homologues: SCCP: Cl <sub>6-7</sub> ; MCCP: Cl <sub>7-8</sub>                                                                                                                                                                                                                                                                                                                                                                                                                                                                                                                                                                                                                                                                                                                                                                                                                                                                                                                                                                                                                                                                                                                                                                                                                                                                                                                                                                                                                                                                                                                                                                      | 19   |
| China                                                                          | Breast milk                                          | C-homologues: SCCP: C <sub>10</sub> /C <sub>11</sub> (47%/31%)<br>MCCP: C <sub>14</sub> (70%);<br>Cl-homologues: SCCP: Cl <sub>6-7</sub> (31%/43)<br>MCCP: Cl <sub>7-8</sub> (34%/40%)                                                                                                                                                                                                                                                                                                                                                                                                                                                                                                                                                                                                                                                                                                                                                                                                                                                                                                                                                                                                                                                                                                                                                                                                                                                                                                                                                                                                                                                                                                                                                      | 20   |
| Northern China                                                                 | Hair                                                 | C-homologues: SCCP: C <sub>10</sub> /C <sub>11</sub> /C <sub>13</sub> (36.2%/27.7%/19.4%);<br>Cl-homologues: SCCP: Cl <sub>6-7</sub><br>MCCP: Cl <sub>7-8</sub>                                                                                                                                                                                                                                                                                                                                                                                                                                                                                                                                                                                                                                                                                                                                                                                                                                                                                                                                                                                                                                                                                                                                                                                                                                                                                                                                                                                                                                                                                                                                                                             | 21   |
|                                                                                | Nails                                                | C-homologues: SCCP: C <sub>10</sub> /C <sub>11</sub> /C <sub>13</sub> (39.2%/29.7%/17.0%);<br>Cl-homologues: SCCP: Cl <sub>6-7</sub> ; MCCP: Cl <sub>7-8</sub>                                                                                                                                                                                                                                                                                                                                                                                                                                                                                                                                                                                                                                                                                                                                                                                                                                                                                                                                                                                                                                                                                                                                                                                                                                                                                                                                                                                                                                                                                                                                                                              |      |

**Table S2 The calculation equation for the EDI of CPs**

| Exposure route                    | Equation                                                                                                                                                                                                                                                                                                                                                                                       |
|-----------------------------------|------------------------------------------------------------------------------------------------------------------------------------------------------------------------------------------------------------------------------------------------------------------------------------------------------------------------------------------------------------------------------------------------|
| Dietary intake:                   | $EDI_{diet} = \sum \frac{C_i \times CR_i}{BW}$ <p><math>EDI_{diet}</math> is the estimated dietary intake of CPs, <math>C_i</math> is CPs concentration in each food group, <math>CR_i</math> is the daily consumption rate of each food, <math>BW</math> is body weight.</p>                                                                                                                  |
| Dust ingestion                    | $EDI_{dust} = \frac{C_{dust} \times IR \times T}{BW}$ <p><math>C_{dust}</math> is the concentration of CPs in dust; <math>IR</math> is the ingestion rate of dust (60 mg/d for toddlers and 30 mg/d for adults); <math>T</math> is the exposure time; <math>BW</math> is the body weight.</p>                                                                                                  |
| Inhalation                        | $EDI_{inhalation} = \frac{C_{air} \times IR \times ED \times AF_{inhalation}}{BW}$ <p><math>C_{air}</math> is the concentration of CPs in air (ng/m<sup>3</sup>); <math>IR</math> is the inhalation rate (m<sup>3</sup>/d) that adjusted by body weight, gender and age; <math>ED</math> is the exposure duration; <math>AF_{inhalation}</math> are the absorption fraction of inhalation.</p> |
| Dermal absorption<br>(Dust)       | $EDI_{dermal} = \frac{C_{dust} \times SA \times AS \times AF \times T}{BW}$ <p><math>C_{dust}</math> is the concentration of CPs in dust (ng/g); <math>SA</math> is skin exposure surface area (cm<sup>2</sup>); <math>AS</math> is the dust adhered to the skin; <math>AF</math> is the dermal absorption factor; <math>T</math> is the exposure time.</p>                                    |
| Dermal absorption<br>(Wristbands) | $EDI_{dermal} = \frac{C_{wb} \times SA \times AF}{BW \times AT}$ <p><math>C_{wb}</math> is the concentration of CPs in the wristbands (ng/cm<sup>2</sup>); <math>SA</math> is skin exposure surface area (cm<sup>2</sup>); <math>AF</math> is the fraction of analyte absorbed by skin; <math>BW</math> is the body weight; <math>AT</math> is the exposure time.</p>                          |

#### References

1. S. Xu, S. Hansen, A. Rautio, M. R. Jarvelin, K. Abass, J. Rysa, S. Palaniswamy, S. Huber, J. O. Grimalt, P. Dumas and J. O. Odland, Monitoring temporal trends of dioxins, organochlorine pesticides and chlorinated paraffins in pooled serum samples collected from Northern Norwegian women: The MISA cohort study, *Environ Res*, 2022, **204**, 111980.
2. L. M. van Mourik, L. L. Toms, C. He, A. Banks, P. Hobson, P. E. G. Leonards, J. de Boer and J. F. Mueller, Evaluating age and temporal trends of chlorinated paraffins in pooled serum

- collected from males in Australia between 2004 and 2015, *Chemosphere*, 2020, **244**, 125574.
3. J. Tomasko, M. Stupak, D. Parizkova, A. Polachova, R. J. Sram, J. Topinka and J. Pulkrabova, Short- and medium-chain chlorinated paraffins in human blood serum of Czech population, *Sci Total Environ*, 2021, **797**, 149126.
  4. X. Zhou, H. Wu, X. Huang, F. Hang and H. Luo, Development a simple and rapid HPLC-ESI-Q-TOF/MS method for determination of short- and medium- chain chlorinated paraffins in human serum, *J Chromatogr B Analyt Technol Biomed Life Sci*, 2019, **1126-1127**, 121722.
  5. N. Zhao, X. Fang, S. Zhang, Y. Zhu, L. Ding and C. Xu, Male renal functions are associated with serum short- and medium-chain chlorinated paraffins in residents from Jinan, China, *Environ Int*, 2021, **153**, 106514.
  6. Y. Liu, X. Han, N. Zhao, X. Fang, S. Zhang, S. Li, W. Jiang and L. Ding, The association of liver function biomarkers with internal exposure of short- and medium-chain chlorinated paraffins in residents from Jinan, China, *Environ Pollut*, 2021, **268**, 115762.
  7. L. Ding, N. Luo, Y. Liu, X. Fang, S. Zhang, S. Li, W. Jiang and N. Zhao, Short and medium-chain chlorinated paraffins in serum from residents aged from 50 to 84 in Jinan, China: Occurrence, composition and association with hematologic parameters, *Sci Total Environ*, 2020, **728**, 137998.
  8. J. Zhang, H. Liao, Y. Chen, X. Li, R. Chen, S. Han, S. Liu and S. Yin, Concentrations and homologue patterns of SCCPs and MCCPs in the serum of the general population of adults in Hangzhou, China, *Chemosphere*, 2023, **335**, 139131.
  9. J. Xu, W. Guo, L. Wei, Y. Gao, H. Zhang, Y. Zhang, M. Sun and J. Chen, Validation of a HRGC-ECNI/LRMS method to monitor short-chain chlorinated paraffins in human plasma, *J Environ Sci (China)*, 2019, **75**, 289-295.
  10. T. Li, Y. Wan, S. Gao, B. Wang and J. Hu, High-Throughput Determination and Characterization of Short-, Medium-, and Long-Chain Chlorinated Paraffins in Human Blood, *Environ Sci Technol*, 2017, **51**, 3346-3354.
  11. L. Qiao, L. Gao, M. Zheng, D. Xia, J. Li, L. Zhang, Y. Wu, R. Wang, L. Cui and C. Xu, Mass Fractions, Congener Group Patterns, and Placental Transfer of Short- and Medium-Chain Chlorinated Paraffins in Paired Maternal and Cord Serum, *Environ Sci Technol*, 2018, **52**, 10097-10103.
  12. M. Aamir, S. Yin, F. Guo, K. Liu, C. Xu and W. Liu, Congener-Specific Mother-Fetus Distribution, Placental Retention, and Transport of C(10-13) and C(14-17) Chlorinated Paraffins in Pregnant Women, *Environ Sci Technol*, 2019, **53**, 11458-11466.
  13. Y. Liu, M. Aamir, M. Li, K. Liu, Y. Hu, N. Liu, Y. Xu, J. Du, J. Xu and W. Liu, Prenatal and postnatal exposure risk assessment of chlorinated paraffins in mothers and neonates: Occurrence, congener profile, and transfer behavior, *J Hazard Mater*, 2020, **395**, 122660.
  14. Y. Wang, W. Gao, Y. Wang and G. Jiang, Distribution and Pattern Profiles of Chlorinated Paraffins in Human Placenta of Henan Province, China, *Environmental Science & Technology Letters*, 2017, **5**, 9-13.
  15. Y. Cao, K. H. Harada, T. Hitomi, T. Niisoe, P. Wang, Y. Shi, H. R. Yang, T. Takasuga and A. Koizumi, Lactational exposure to short-chain chlorinated paraffins in China, Korea, and Japan, *Chemosphere*, 2017, **173**, 43-48.
  16. G. O. Thomas, D. Farrar, E. Braekevelt, G. Stern, O. I. Kalantzi, F. L. Martin and K. C. Jones, Short and medium chain length chlorinated paraffins in UK human milk fat, *Environ Int*, 2006,

32, 34-40.

17. Y. Zhou, B. Yuan, E. Nyberg, G. Yin, A. Bignert, A. Glynn, J. O. Odland, Y. Qiu, Y. Sun, Y. Wu, Q. Xiao, D. Yin, Z. Zhu, J. Zhao and A. Bergman, Chlorinated Paraffins in Human Milk from Urban Sites in China, Sweden, and Norway, *Environ Sci Technol*, 2020, **54**, 4356-4366.
18. L. Yang, Z. Wang, J. Li, Y. Ma, L. Kong, H. Yang, L. Wang, Y. Liu, Y. Lu and J. Zhang, Evaluation of short chain chlorinated paraffins in human milk and their intake by infants in Hebei Province, China, *Food Addit Contam Part A Chem Anal Control Expo Risk Assess*, 2018, **35**, 2011-2021.
19. D. Xia, L. R. Gao, M. H. Zheng, J. G. Li, L. Zhang, Y. N. Wu, L. Qiao, Q. C. Tian, H. T. Huang, W. B. Liu, G. J. Su and G. R. Liu, Health risks posed to infants in rural China by exposure to short- and medium-chain chlorinated paraffins in breast milk, *Environ Int*, 2017, **103**, 1-7.
20. D. Xia, L. Gao, M. Zheng, J. Li, L. Zhang, Y. Wu, Q. Tian, H. Huang and L. Qiao, Human Exposure to Short- and Medium-Chain Chlorinated Paraffins via Mothers' Milk in Chinese Urban Population, *Environ Sci Technol*, 2017, **51**, 608-615.
21. X. Han, H. Chen, M. Shen, M. Deng, B. Du and L. Zeng, Hair and nails as noninvasive bioindicators of human exposure to chlorinated paraffins: Contamination patterns and potential influencing factors, *Sci Total Environ*, 2021, **798**, 149257.
